# Supplementary material for: Evaluation of Clinically Relevant Drug–Drug Interactions and Population Pharmacokinetics of Darolutamide in Patients with Nonmetastatic Castration-Resistant Prostate Cancer: Results of Pre-Specified and Post Hoc Analyses of the Phase III ARAMIS Trial
Source: PubMed Central journal article supplement — Target Oncol. 2019 Sep 30;14(5):527–39. doi: 10.1007/s11523-019-00674-0 (PMC6797643; doi:10.1007/s11523-019-00674-0), 2019-09-30
Supplement: 11523_2019_674_MOESM1_ESM.pdf [file 11523_2019_674_MOESM1_ESM.pdf]

**Targeted Oncology**

**Evaluation of Clinically Relevant Drug–Drug Interactions  
with Darolutamide in the Phase 3 ARAMIS Trial for Patients  
with Nonmetastatic Castration-Resistant Prostate Cancer:  
Results of Pre-Specified and Post-Hoc Analyses of the  
Phase III ARAMIS Trial**

**Neal Shore<sup>a\*</sup>, Christian Zurth<sup>b</sup>, Robert Fricke<sup>b</sup>, Hille Gieschen<sup>b</sup>, Kristina Graudenz<sup>b</sup>, Mikko Koskinen<sup>c</sup>, Bart Ploeger<sup>b</sup>, Jonathan Moss<sup>d</sup>, Olaf Prien<sup>b</sup>, Gustavo Borghesi<sup>b</sup>, Oana Petrenciuc<sup>b</sup>, Teuvo L. Tammela<sup>e</sup>, Iris Kuss<sup>b</sup>, Frank Verhoken<sup>b</sup>, Matthew R. Smith<sup>f</sup>, Karim Fizazi<sup>g</sup>**

<sup>a</sup> Carolina Urologic Research Center, Myrtle Beach, SC, USA; <sup>b</sup>Bayer AG, Berlin, Germany; <sup>c</sup>Orion Corporation Orion Pharma, Espoo, Finland; <sup>d</sup>BAST Inc. Ltd., Loughborough, UK; <sup>e</sup>Tampere University Hospital and Tampere University, Tampere, Finland; <sup>f</sup>Massachusetts General Hospital Cancer Center, Boston, USA; <sup>g</sup>Institut Gustave Roussy, Université Paris-Sud, Villejuif, France

**\* Corresponding author:**

Neal Shore

Carolina Urologic Research Center, Myrtle Beach, SC, USA

E-mail: [NShore@gsuro.com](mailto:NShore@gsuro.com)

## Supplementary materials

### Supplementary methods

#### *Pharmacokinetic assessments*

PK samples were taken on Day 15, Day 29, and Week 16 at the following timepoints: 10–14 hours after the previous dose ('trough'), 1–4 hours after the previous dose ('early') and 4–8 hours after the previous dose ('late'). A quantitative liquid chromatography–tandem mass spectrometry (LC-MS/MS) method was established for the determination of (*S,R*)-darolutamide, (*S,S*)-darolutamide and keto-darolutamide in human plasma and urine (darolutamide diastereomers only). The plasma method utilised solid phase extraction followed by chiral high-performance liquid chromatography with tandem mass spectrometric detection, quantitation being achieved by weighted linear regression using <sup>13</sup>C-labelled internal standards. Method validation and study sample analysis were performed in accordance with pertinent guidelines [1, 2]. The validated plasma assay range was 5 to 5000 ng/mL for the darolutamide diastereomers and keto-darolutamide. The determined analyte concentrations in study samples were verified by assaying quality control samples of blank matrix spiked with known concentrations of the respective analytes. Concentrations below the lower limit of quantification (LLOQ) were omitted. Concentrations above the LLOQ were determined with a precision better than 15% and an accuracy within 85–115%, with concentrations at the LLOQ being determined with a precision of 20% and accuracy within 80–120%, in accordance with standard operating procedures and pertinent method validation guidelines. Bioanalytical results are summarized in the table below.

|                           | Mean inter-assay accuracy and precision of back-calculated concentrations <sup>a</sup> |              | Accuracy and precision of lowest calibrator (LLOQ) |              |                            | QC samples         |              |
|---------------------------|----------------------------------------------------------------------------------------|--------------|----------------------------------------------------|--------------|----------------------------|--------------------|--------------|
|                           | Accuracy (bias), %                                                                     | Precision, % | Accuracy, %                                        | Precision, % | Concentration range, ng/mL | Accuracy (bias), % | Precision, % |
| <b>(S,R)-darolutamide</b> | -3.2 to 2.4                                                                            | ≤4.5         | -0.4                                               | 2.0          | 15-4000                    | -4.3 to -1.3       | ≤5.1         |
| <b>(S,S)-darolutamide</b> | -3.4 to 2.4                                                                            | ≤5.1         | -0.8                                               | 2.2          | 15-4000                    | -4.0 to -0.4       | ≤5.          |
| <b>Keto-darolutamide</b>  | -1.6 to 1.0                                                                            | ≤3.8         | -0.2                                               | 2.0          | 15-4000                    | -1.3 to 0          | ≤5.5         |

LLOQ lower limit of quantification; QC quality control.

Individual exposure values at steady state for all patients were calculated after 15 days of darolutamide dosing using numerical integration of the population pharmacokinetic (PK) model.

### **Population PK analysis**

Models were built so that all structural parameters of the three analytes were estimated simultaneously, and the standard NONMEM first-order conditional estimation method with interaction was used. The starting point for the base model was taken from preclinically identified metabolic pathways, specifically incorporating the conversion of the metabolite, keto-darolutamide, back to (S,S)-darolutamide and to a lesser extent also to (S,R)-darolutamide. The base model was parameterized using distribution volumes and clearances. The difference of individual parameters  $P_i$  from the population mean  $\theta$  was parameterized as  $\eta$  and described using one of the following equations:

$$P_i = \theta + \eta \quad \text{Constant (additive) variance model}$$

$$P_i = \theta \cdot \exp(\eta) \quad \text{Exponential (lognormal) variance model}$$

The residual variability, which is the result of assay error, data error and model misspecification was modelled using one of the following equations:

$$C_{ij} = C_{pred,ij} + \varepsilon_{ij} \quad \text{Additive error model}$$

$$C_{ij} = C_{pred,ij} \cdot (1 + \varepsilon_{ij}) \quad \text{Proportional error model}$$

Where  $C_{ij}$  is the  $j^{\text{th}}$  observation of the  $i^{\text{th}}$  individual,  $C_{pred,i,j}$  is the model-predicted value and  $\varepsilon_{ij}$  is the residual error for the current observation. All variability parameters were characterized by assuming normal distributions with a mean of 0 and an estimated variance of  $\sigma^2$  for IIV and  $\sigma^2$  or residual error.

In the multivariate analysis, the covariate effects were implemented in the base model as follows:

- Allometric scaling was done for bodyweight:

$$P_i = \theta_{TV} \cdot (BW_i/BW_{med})^{\theta_{cov}} \cdot \exp(i\gamma)$$

- Continuous covariates:

$$P_i = \theta_{TV} \cdot \exp(\theta_{cov} \cdot (COV_i - COV_{med})) \cdot \exp(i\gamma)$$

- Categorical covariates:

$$P_i = \theta_{TV} \cdot (1 + N1 \cdot \theta_{cov1} + N2 \cdot \theta_{cov2} + \dots) \cdot \exp(i\gamma)$$

- Where  $P_i$  denoted the individual structural parameter value;  $\theta_{TV}$  the estimated typical parameter value;  $BW_i$  the individual's bodyweight;  $BW_{med}$  the population median bodyweight;  $COV_i$  and  $COV_{med}$  are the individual and population median covariate values, respectively;  $\theta_{cov}$  the estimated parameter for the covariate effect;  $N1 = N2 = 0$  for the most prevalent covariate category;  $N1 = 1$  and  $N2 = 0$  for the next most prevalent category; and  $N1 = 0$  and  $N2 = 1$  for the next category etc. The number of terms in the equation depends on the number of covariate categories.

The covariate analysis was performed with a full stepwise forward inclusion/backward elimination procedure. During forward inclusion, a reduction in the objective function corresponding to  $p < 0.001$  ( $\Delta OFV < -10.828$  for one estimated parameter, with adjustment for greater than one parameter according to Chi-squared distribution) was required for the declaration of a significant covariate effect. In backward elimination, the requirement was increased to  $p > 0.0001$  ( $\Delta OFV > +15.137$  for one estimated parameter). The covariate model after the forward inclusion and backward elimination was called the selected model. Prediction-corrected visual predictive check was used for model qualification. These

were always generated from 1000 simulations of the entire dataset with all random variables (inter-individual and residual) being sampled from the estimated variance-covariance matrix.

**Supplementary Figure 1** Structure of the population PK covariate model

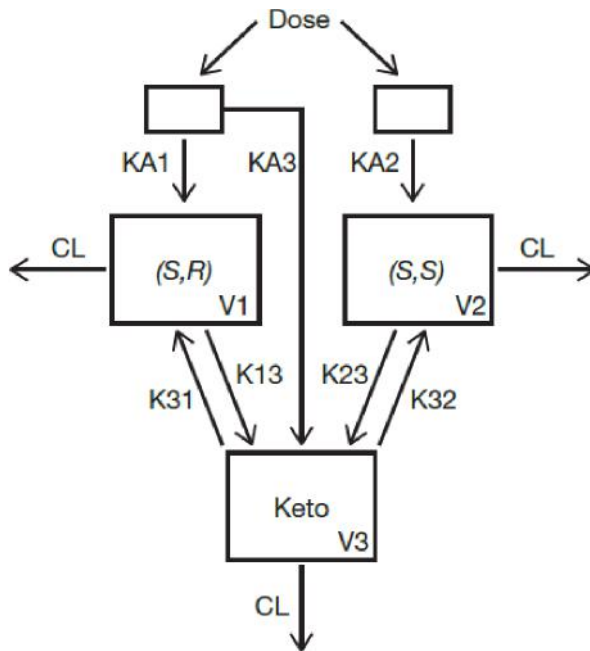

$$\begin{aligned}
 & 13 = , \\
 & 31 = (\exp(\dots)) \cdot \dots, 1 + \exp(\dots) \\
 & 23 = , \\
 & 32 = [1 - (\exp(\dots) \exp(\dots))] \cdot \dots, 1 + \\
 & \quad = \cdot (1 + B \cdot (-1)) \cdot \exp(\dots (-75)) + \cdot (\dots - 81.35)) \cdot \\
 & \quad \text{where } B=1 \text{ when geographical region = JPN, else } B=0. \\
 & 1 = 2 = 3 = , \\
 & = + \cdot (-21) + 2.
 \end{aligned}$$

CL clearance, KA1 absorption rate constant for (S,R)-darolutamide, KA2 absorption rate constant for (S,S)-darolutamide, KA3 absorption rate constant for keto-darolutamide,  $K_{nm}$  rate constants for conversion between keto-darolutamide and (S,R)- and (S,S)-darolutamide,  $CL_{pop}$  estimated CL for a patient with median value of AGE, SCRE (serum creatinine), and geographic region not equal to JPN, parameter describing factor by which CL is multiplied if geographical region = JPN, parameter describing influence of AGE on CL, parameter describing the influence of SCRE on CL, V1 volume of distribution for (S,R)-darolutamide, V2 volume of distribution for (S,S)-darolutamide, V3 volume of distribution for keto-darolutamide, RR parameter describing the conversion ratio of keto-darolutamide to either (S,R)-darolutamide or (S,S)-darolutamide, estimated value of parameter describing the conversion ratio of keto-darolutamide to either (S,R)-darolutamide or (S,S)-darolutamide for a patient with AST = 21, parameter describing influence of AST on RR.

**Supplementary Table 1** Baseline covariates included in the population PK analysis

| Covariate           | Unit                      | Type                     | Description                                                                                                                                                              |
|---------------------|---------------------------|--------------------------|--------------------------------------------------------------------------------------------------------------------------------------------------------------------------|
| Age                 | years                     | Continuous               | Age at start of treatment                                                                                                                                                |
| Age                 | years                     | Categorical              | <65, 65–74, 75–84, ≥85                                                                                                                                                   |
| Age                 | years                     | Categorical              | >65, and ≥65                                                                                                                                                             |
| Bodyweight          | kg                        | Continuous               | Bodyweight at start of treatment                                                                                                                                         |
| Height              | cm                        | Continuous               | Height at start of treatment                                                                                                                                             |
| Ethnicity           | –                         | Categorical              | 1-White; 2-Asian; 3-Other                                                                                                                                                |
| Geographical region | –                         | Categorical              | 0-Rest of world; 1-Japan                                                                                                                                                 |
| Japan               |                           | (dichotomous)            |                                                                                                                                                                          |
| Serum creatinine    | μmol/L                    | Continuous               | Serum creatinine at start of treatment                                                                                                                                   |
| eGFR                | mL/min/1.73m <sup>2</sup> | Continuous               | eGFR at start of treatment                                                                                                                                               |
| Renal function      | –                         | Categorical<br>(ordered) | 1-Normal (eGFR ≥90); 2-Mild (eGFR <90 and ≥60); 3-Moderate or worse (eGFR <60)                                                                                           |
| Serum albumin       | g/L                       | Continuous               | Serum albumin at start of treatment                                                                                                                                      |
| Total protein       | g/L                       | Continuous               | Total protein at start of treatment                                                                                                                                      |
| Total bilirubin     | μmol/L                    | Continuous               | Total bilirubin at start of treatment                                                                                                                                    |
| AST                 | U/L                       | Continuous               | AST at start of treatment                                                                                                                                                |
| ALT                 | U/L                       | Continuous               | ALT at start of treatment                                                                                                                                                |
| Hepatic function    | –                         | Categorical<br>(ordered) | Hepatic function based on NCI-ODWG criteria: 1-Normal; 2-mild or worse                                                                                                   |
| Comedication        | –                         | Categorical              | Comedication given during treatment<br>(Y/N) including:<br>BCRP inhibitor<br>CYP3A4 inducer<br>CYP3A4 inhibitor<br>P-gp inducer P-gp inhibitor<br>Protein pump inhibitor |



---

UGT1A9 inducer

UGT1A9 inhibitor

---

*ALT* alanine aminotransferase, *AST* aspartate aminotransferase, *BCRP* breast cancer resistance protein, *CYP* cytochrome P450, *eGFR* estimated glomerular filtration rate, *NCI-ODWG* National Cancer Institute Organ Dysfunction Working Group, *P-gp* P-glycoprotein, *PK* pharmacokinetic, *UGT* UDP-glucuronosyltransferase.

**Supplementary Table 2** Summary of concomitant statins that are BCRP substrates used by ARAMIS patients (safety population)

| Standardized medication name                        | Patients using concomitant statin,<br><i>n</i> (%) |                              |
|-----------------------------------------------------|----------------------------------------------------|------------------------------|
|                                                     | Darolutamide<br>( <i>N</i> = 954)                  | Placebo<br>( <i>N</i> = 554) |
| Any concomitant statin                              | 306 (32.1)                                         | 202 (36.5)                   |
| Any concomitant statin known to be a BCRP substrate | 280 (29.4)                                         | 171 (30.9)                   |
| Atorvastatin                                        | 75 (7.9)                                           | 51 (9.2)                     |
| Atorvastatin calcium                                | 61 (6.4)                                           | 40 (7.2)                     |
| Simvastatin                                         | 92 (9.6)                                           | 64 (11.6)                    |
| Rosuvastatin                                        | 23 (2.4)                                           | 7 (1.3)                      |
| Rosuvastatin calcium                                | 38 (4.0)                                           | 12 (2.2)                     |
| Fluvastatin                                         | 2 (0.2)                                            | 1 (0.2)                      |
| Fluvastatin sodium                                  | 1 (0.1)                                            | 0                            |

*BCRP* breast cancer resistance protein.

This analysis used data from the January 17, 2019 datacut.

## References

1. Food and Drug Administration. Bioanalytical method validation: guidance for industry. 2018. <https://www.fda.gov/downloads/Drugs/Guidances/ucm070107.pdf>. Accessed February 21, 2019.
2. European Medicines Agency. Guideline on bioanalytical method validation. 2011. [https://www.ema.europa.eu/documents/scientific-guideline/guideline-bioanalytical-method-validation\\_en.pdf](https://www.ema.europa.eu/documents/scientific-guideline/guideline-bioanalytical-method-validation_en.pdf). Accessed February 21, 2019.
